# Supplementary material
Source: publisher figshare collection journal article supplement (https://tandf.figshare.com/articles/dataset/_/5732496)

**Figure S3. Related to Figure 2**

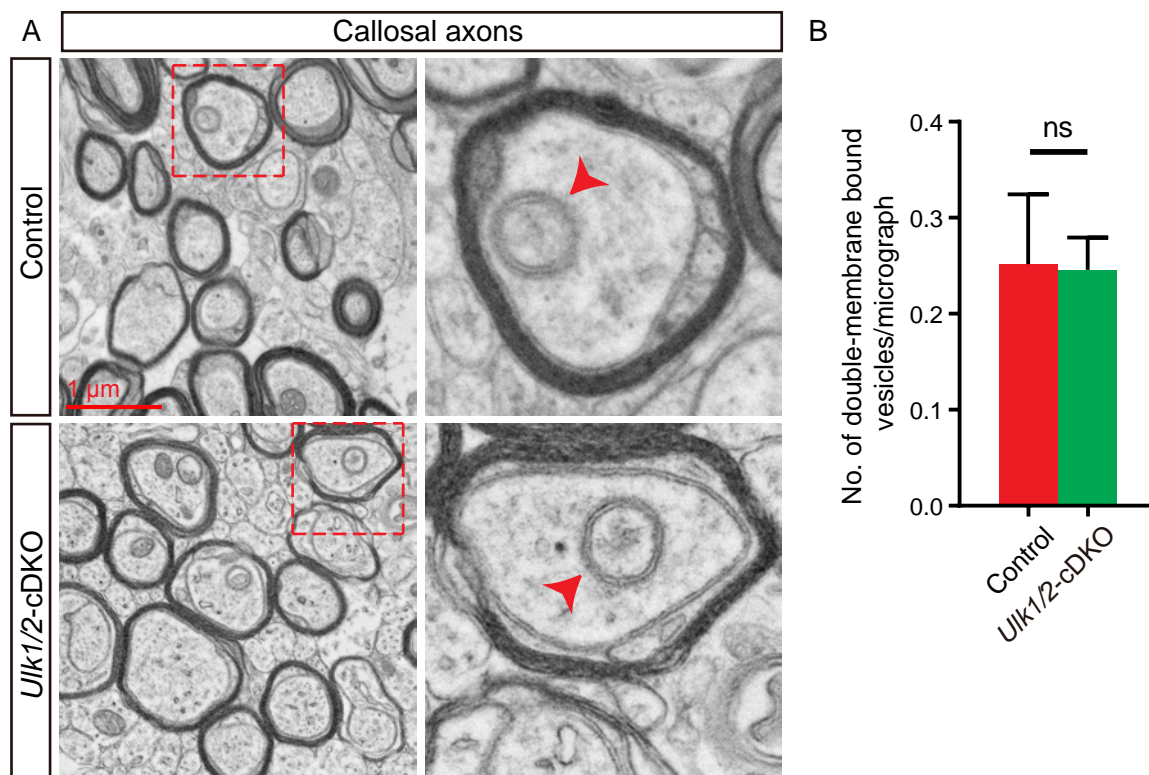

Supplement: Supplementary file 1 [file 3]

Figure S1. Related to Figure 1.

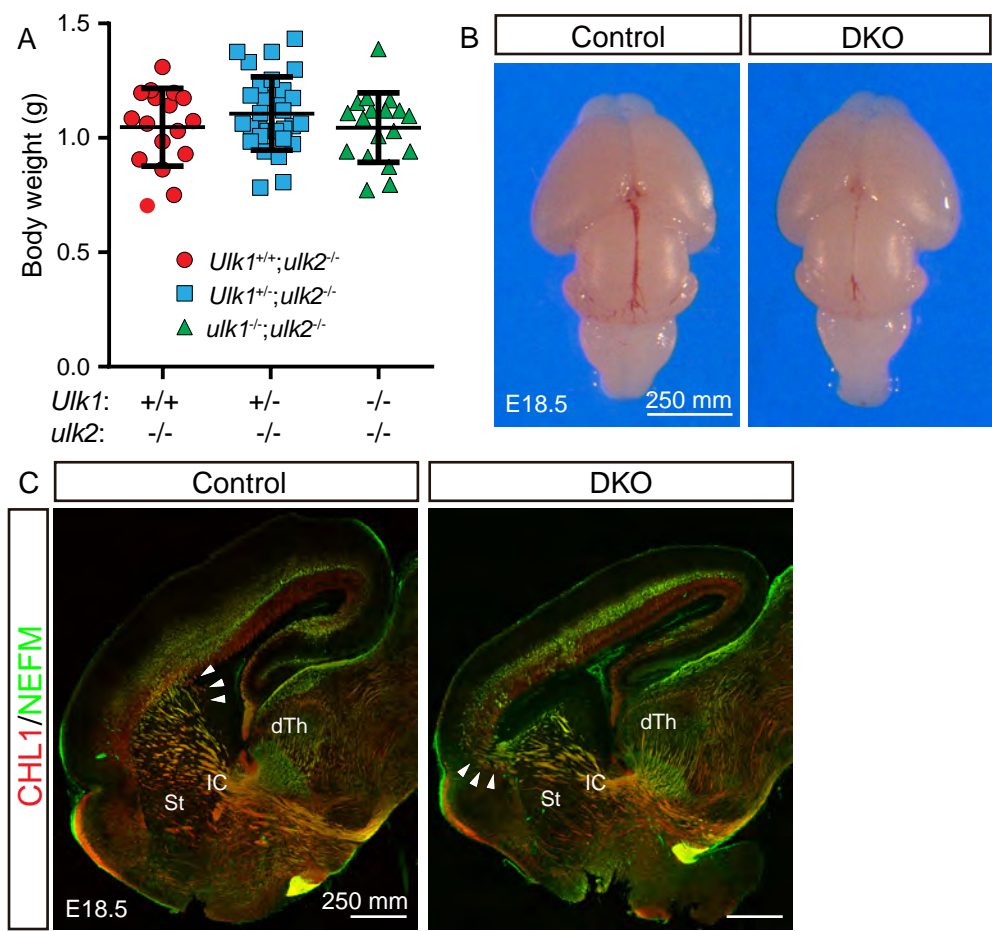

Supplement: Supplementary file 2 [file 3]

Figure S4. Related to Figure 4

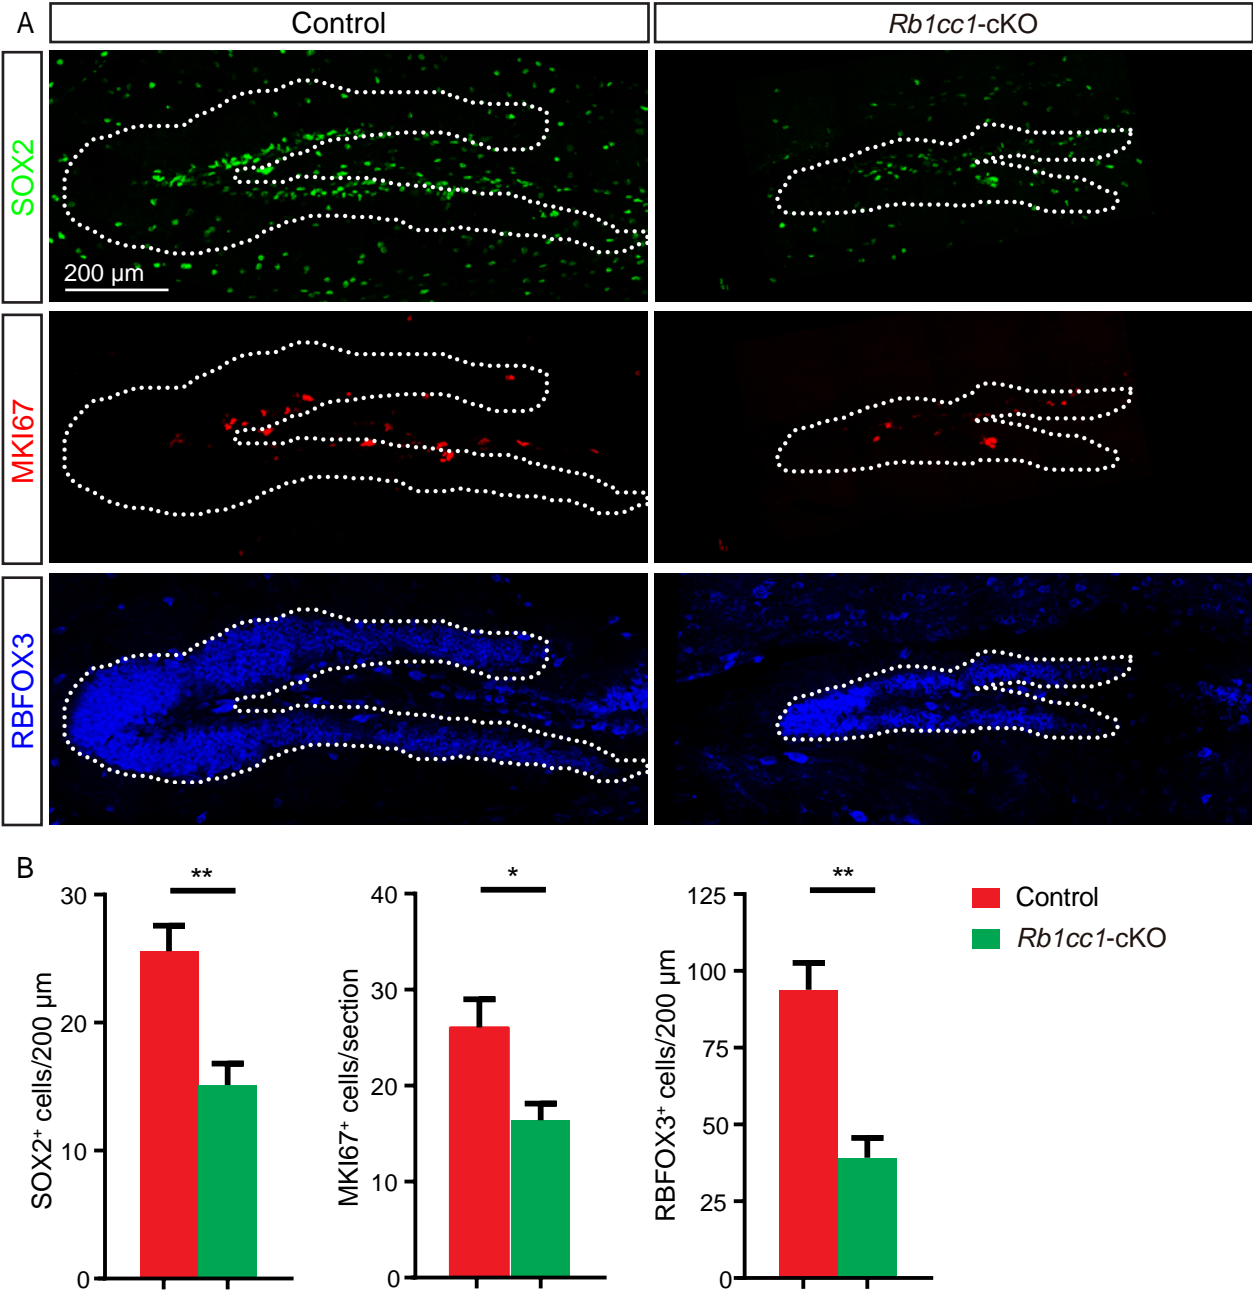

Supplement: Supplementary file 3 [file 3]

**Figure S2. Related to Figure 2**

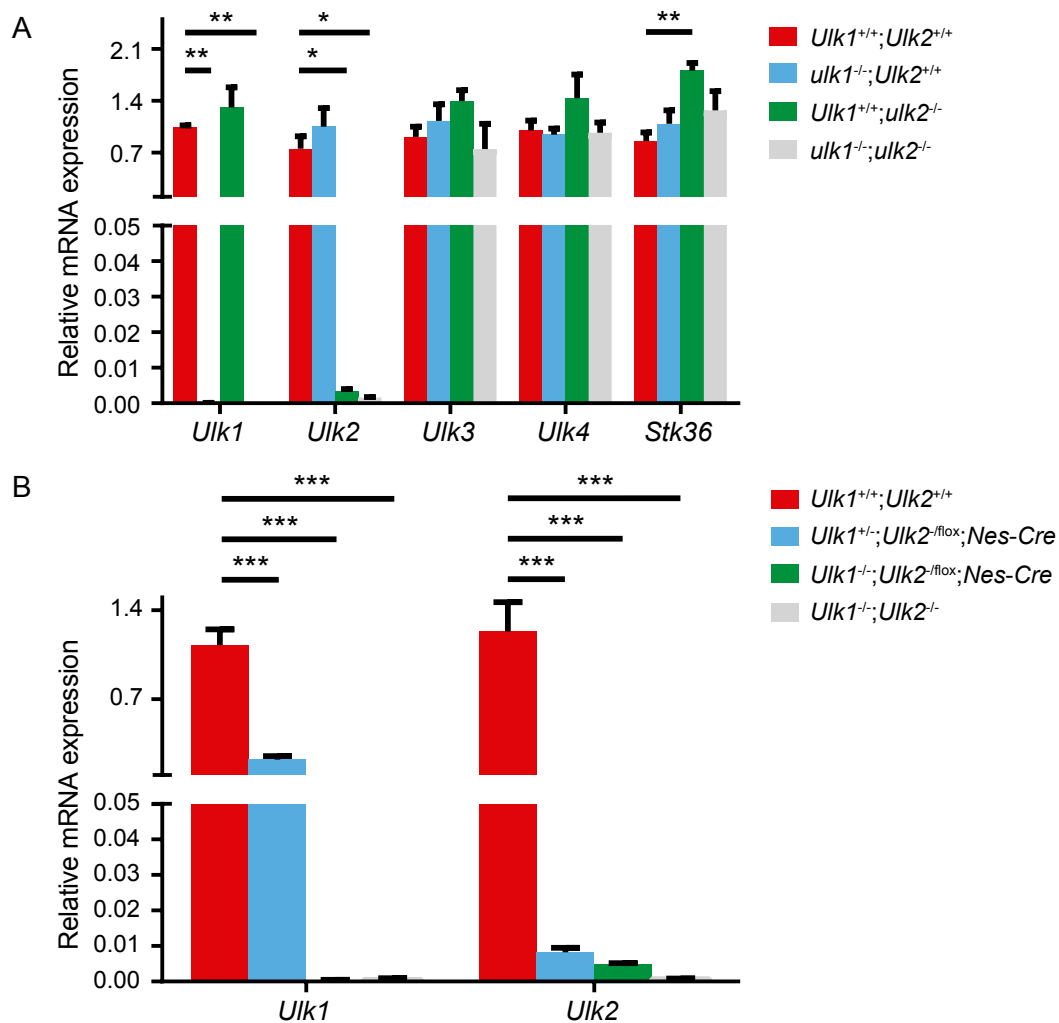

Supplement: Supplementary file 4 [file 3]
